# Supplementary material for: Associations between Socio-Economic Status and Unfavorable Social Indicators of Child Wellbeing; a Neighbourhood Level Data Design
Source: MDPI journal article supplement (doi:10.3390/ijerph182312661), 2021-12-01
Supplement: s1 [file s1]

Supplementary Table S1. Primary analysis for the main outcome measures, estimates of SES score and social indicators of child wellbeing, n = 3,531.

| Social indicator of child wellbeing    | Effect       | Beta estimate (95% confidence interval) | Variance estimate of PC4:municipality (SD) | Variance estimate of municipality (SD) | R squared |
|----------------------------------------|--------------|-----------------------------------------|--------------------------------------------|----------------------------------------|-----------|
| Children living in families on welfare | Intercept    | 4.63 (4.29 ; 4.98)                      | 18.24 (4.27)                               | 4.86 (2.20)                            | 0.90      |
|                                        | SES score, 1 | -3.43 (-3.83 ; -3.04)                   |                                            |                                        |           |
|                                        | SES score, 2 | -2.79 (-3.11 ; -2.46)                   |                                            |                                        |           |
|                                        | Year         | 0.045 (0.040 ; 0.050)                   |                                            |                                        |           |
| Delinquent youth                       | Intercept    | 2.12 (2.04 ; 2.21)                      | 1.58 (1.26)                                | 0.44 (0.67)                            | 0.54      |
|                                        | SES score    | -0.27 (-0.31 ; -0.23)                   |                                            |                                        |           |
|                                        | Year         | -0.18 (-0.183 ; -0.174)                 |                                            |                                        |           |
| Unemployed youth                       | Intercept    | 1.51 (1.34 ; 1.69)                      | 0.45 (0.67)                                | 0.30 (0.55)                            | 0.33      |
|                                        | SES score, 1 | -0.36 (-0.53 ; -0.20)                   |                                            |                                        |           |
|                                        | SES score, 2 | -0.62 (-0.78 ; -0.47)                   |                                            |                                        |           |
|                                        | SES score, 3 | -1.44 (-1.79 ; -1.08)                   |                                            |                                        |           |
|                                        | SES score, 4 | -1.20 (-1.48 ; -0.93)                   |                                            |                                        |           |
|                                        | Year         | -0.102 (-0.107 ; -0.098)                |                                            |                                        |           |

Supplementary Table S2. Results of the secondary outcome measures, adjusted for the number of children or adolescents living in a certain neighbourhood, n = 3,531.

| Child social determinant | Effect       | Estimate (95% confidence interval) | Variance estimate of PC4 nested within municipality (SD) | Variance estimate of municipality (SD) |
|--------------------------|--------------|------------------------------------|----------------------------------------------------------|----------------------------------------|
|                          | Intercept    | 14.92 (14.41 ; 15.06)              | 0.00 (0.00)                                              | 2.19 (1.48)                            |
|                          | SES score, 1 | -1.74 (-2.13 ; -1.35)              |                                                          |                                        |

|                                      |                              |                          |              |              |
|--------------------------------------|------------------------------|--------------------------|--------------|--------------|
| Child social services involved       | SES score, 2                 | -1.71 (-2.00 ; -1.43)    |              |              |
|                                      | Year                         | -1.05 (-1.10 ; -1.01)    |              |              |
|                                      | Population size (ages 0-17)  | 0.017 (0.013 ; 0.023)    |              |              |
| Teenage mothers                      | Intercept                    | 1.04 (0.0.94 ; 1.13 )    | 0.14 (0.38)  | 0.06 (0.25)  |
|                                      | SES score, 1                 | -0.47 (-0.54 ; -0.40)    |              |              |
|                                      | SES score, 2                 | -1.38 (-1.58 ; -1.18)    |              |              |
|                                      | SES score, 3                 | -0.75 (-0.89 ; -0.60)    |              |              |
|                                      | Year                         | -0.035 (-0.039 ; -0.030) |              |              |
|                                      | Population size (ages 15-19) | 0.011 (0.003 ; 0.027)    |              |              |
| Children living with a single parent | Intercept                    | 16.70 (15.62 ; 17.79)    | 23.95 (4.89) | 13.32 (3.65) |
|                                      | SES score, 1                 | -9.52 (-10.50 ; -8.55)   |              |              |
|                                      | SES score, 2                 | -9.16 (-10.03; -8.29)    |              |              |
|                                      | SES score, 3                 | -20.39 (-22.58 ; -18.19) |              |              |
|                                      | SES score, 4                 | -16.46 (-18.12 ; -14.80) |              |              |
|                                      | Year                         | 0.35 (0.30 ; 0.40)       |              |              |
|                                      | Population size (ages 0-17)  | 0.16 (0.14 ; 0.18)       |              |              |
| Reported and confirmed child abuse   | Intercept                    | 1.26 (1.19 ; 1.33)       | 0.11 (0.33)  | 0.11 (0.33)  |
|                                      | SES score, 1                 | -1.63 (-1.74 ; -1.52)    |              |              |
|                                      | SES score, 2                 | -0.77 (-0.86 ; -0.69)    |              |              |
|                                      | Year                         | 0.017 (0.015 ; 0.019)    |              |              |
|                                      | Population size (ages 0-17)  | 0.005 (0.003 ; 0.006)    |              |              |
|                                      | Intercept                    | 2.56 (2.37; 2.76)        | 1.15 (1.07)  | 0.11 (0.33)  |

|                          |                                                                         |                         |                |              |
|--------------------------|-------------------------------------------------------------------------|-------------------------|----------------|--------------|
| Children with a handicap | SES score, 1                                                            | -2.32 (-2.65 ; -1.98)   |                |              |
|                          | SES score, 2                                                            | -1.17 (-1.41 ; -0.92)   |                |              |
|                          | Year                                                                    | 0.21 (0.20 ; 0.22)      |                |              |
|                          | Population size (ages 0-17)                                             | 0.005 (0.0002 ; 0.009)  |                |              |
| School drop-outs         | Intercept                                                               | 3.99 (3.79 ; 4.19)      | 0.86 (0.93)    | 0.49 (0.70)  |
|                          | SES score, 1                                                            | -1.52 (-1.67 ; -1.38)   |                |              |
|                          | SES score, 2                                                            | -2.61 (-3.02 ; -2.20)   |                |              |
|                          | SES score, 3                                                            | -1.54 (-1.84 ; -1.25)   |                |              |
|                          | Year                                                                    | -0.27 (-0.281 ; -0.269) |                |              |
|                          | Population size (number of children in primary and secondary education) | 0.020 (0.008 ; 0.032)   |                |              |
| Disadvantaged pupils     | Intercept                                                               | 9.57 (8.43 ; 10.99)     | 114.55 (10.70) | 30.42 (5.52) |
|                          | SES score, 1                                                            | 2.36 (1.50 ; 3.21)      |                |              |
|                          | SES score, 2                                                            | 3.24 (2.27 ; 4.22)      |                |              |
|                          | SES score, 3                                                            | 2.54 (1.60 ; 3.47 )     |                |              |
|                          | SES score, 4                                                            | 1.88 (0.91 ; 2.85 )     |                |              |
|                          | SES score, 5                                                            | -1.75 (-2.75 ; -0.76 )  |                |              |
|                          | SES score, 6                                                            | 5.98 (3.88 ; 8.08 )     |                |              |
|                          | SES score, 7                                                            | 3.86 (1.89 ; 5.84 )     |                |              |
|                          | Year                                                                    | -1.46 (-1.49 ; -1.43)   |                |              |
|                          | Population size (number of children in                                  | -0.21 (-0.27 ; -0.14)   |                |              |

|                                       |                                                                         |                          |               |              |
|---------------------------------------|-------------------------------------------------------------------------|--------------------------|---------------|--------------|
|                                       | primary education                                                       |                          |               |              |
| Children in special education         | Intercept                                                               | 2.75 (2.43 ; 3.06)       | 4.72 (0.2.17) | 0.25 (0.50)  |
|                                       | SES score, 1                                                            | -2.17 (-2.72 ; -1.62)    |               |              |
|                                       | SES score, 2                                                            | -0.78 (-1.16 ; -0.40)    |               |              |
|                                       | Year                                                                    | -0.0005 (-0.014 ; 0.013) |               |              |
|                                       | Population size (number of children in primary and secondary education) | 0.06 (0.04 ; 0.07)       |               |              |
| Children participating in sport clubs | Intercept                                                               | 24.16 (22.29 ; 26.04)    | 65.31 (8.08)  | 41.65 (6.45) |
|                                       | SES score, 1                                                            | 13.31 (12.04 ; 14.59)    |               |              |
|                                       | SES score, 2                                                            | 32.80 (29.28 ; 36.32)    |               |              |
|                                       | SES score, 3                                                            | 20.94 (18.59 ; 23.29)    |               |              |
|                                       | Year                                                                    | 1.54 (1.38 ; 1.70)       |               |              |
|                                       | Population size (ages 0-17)                                             | -0.03 (-0.07 ; 0.01)     |               |              |

*SES score 1: first cubic spline, SES score 2: second cubic spline, SES score 3: third cubic spline, etc.*

Supplementary Table S3. Characteristics of children in the age group 0-2 years old, n = 3,541.

| Variable                                           | Median | 95% range    | Min-max      |
|----------------------------------------------------|--------|--------------|--------------|
| SES score 2014                                     | 0.15   | -2.84 – 1.90 | -8.19 – 2.93 |
|                                                    |        |              |              |
| Children living in families on welfare in 2014 (%) | 2.22   | 0.00 – 18.18 | 0.00 – 42.86 |
| Child social services involved in 2015 (%)         | 0.79   | 0.00 – 3.75  | 0.00 – 40.00 |
| Single parents in 2015 (%)                         | 5.71   | 0.00 – 25.00 | 0.00 – 66.67 |

|                                                |      |             |              |
|------------------------------------------------|------|-------------|--------------|
| Reported and confirmed child abuse in 2015 (%) | 0.00 | 0.00 – 3.33 | 0.00 – 11.25 |
| Children with a handicap in 2015 (%)           | 0.83 | 0.00 – 5.00 | 0.00 – 14.00 |

Supplementary Table S4. Linear regression analyses for SES score and social indicators of child wellbeing, adjusted for the number of children living in a certain neighbourhood, n=3,541.

| Year 2014                               | 0-2 year old children |                 | 0-17 year old children |                 |
|-----------------------------------------|-----------------------|-----------------|------------------------|-----------------|
| Variable                                | Beta estimate         | 95% CI          | Estimate               | 95% CI          |
| Reported and confirmed child abuse*     | 1: <b>-3.61</b>       | (-4.57 ; -2.56) | 1: <b>-2.27</b>        | (-2.72 ; -1.78) |
|                                         | 2: <b>-2.64</b>       | (-2.96 ; -2.32) | 2: <b>-2.96</b>        | (-3.48 ; -2.39) |
|                                         |                       |                 | 3: <b>-2.67</b>        | (-3.17 ; -2.13) |
|                                         |                       |                 | 4: <b>-3.06</b>        | (-3.58 ; -2.50) |
|                                         |                       |                 | 5: <b>-2.35</b>        | (-2.83 ; -1.86) |
|                                         |                       |                 | 6: <b>-5.46</b>        | (-6.57 ; -4.25) |
|                                         |                       |                 | 7: <b>-2.41</b>        | (-3.56 ; -1.57) |
| Year 2015                               | 0-2 year old children |                 | 0-17 year old children |                 |
| Variable                                | Estimate              | 95% CI          | Estimate               | 95% CI          |
| Children living in families on welfare* | 1: <b>-2.65</b>       | (-2.81 ; -2.49) | 1: <b>-2.97</b>        | (-4.52 ; -3.59) |
|                                         | 2: <b>-3.18</b>       | (-3.97 ; -2.37) | 2: <b>-3.48</b>        | (-5.04 ; -4.66) |
|                                         | 3: <b>-4.26</b>       | (-4.78 ; -3.76) | 3: <b>-4.25</b>        | (-5.04 ; -4.66) |

|                                 |                 |                 |                 |                  |
|---------------------------------|-----------------|-----------------|-----------------|------------------|
| Child social services involved* | 1: <b>-2.02</b> | (-2.26 ; -1.78) | 1: <b>-0.90</b> | (-1.29 ; -0.05)  |
|                                 | 2: <b>-5.25</b> | (-6.19 ; -4.23) | 2: <b>-0.66</b> | (-0.74 ; -0.58)  |
|                                 | 3: <b>-1.74</b> | (-2.18 ; -1.32) |                 | (-1.56 ; -1.08)  |
| Single parents*                 | 1: <b>-1.06</b> | (-1.44 ; -0.64) | 1: <b>-0.90</b> | (-1.21 ; -0.57)  |
|                                 | 2: <b>-1.46</b> | (-1.73 ; -1.18) | 2: <b>-1.32</b> | (-1.53 ; - 1.11) |
|                                 | 3: <b>-1.31</b> | (-2.20 ; -0.37) | 3: <b>-1.01</b> | (-1.72 ; - 0.28) |
|                                 | 4: <b>-1.82</b> | (-2.22 ; -1.42) | 4: <b>-1.33</b> | (-1.62 ; - 1.06) |
| Children with a handicap*       | 1: 0.88         | (-0.34 ; 2.30)  | 1: <b>-0.49</b> | (-0.65 ; -0.31)  |
|                                 | 2: 0.41         | (-0.32 ; 1.25)  | 2: <b>-0.03</b> | (-0.74 ; -0.70)  |
|                                 | 3: 2.16         | (-0.48 ; 5.21)  | 3: <b>-0.65</b> | (-0.87 ; -0.43)  |
|                                 | 4: -0.23        | (-1.00 ; 0.54)  |                 |                  |

\*cubic splines were applied to model for non-linearity

- estimates in bold are statistically significant alpha <0.05
